1 **Title: Genomic characterization of the virulence-associated pyomelanin**  
2 **biosynthetic pathway in pigment-producer strains from the pandemic**  
3 ***Acinetobacter baumannii* IC-5.**

4  
5 **Érica Fonseca<sup>1,+</sup>, Fernanda Freitas<sup>1</sup>, Raquel Caldart<sup>2</sup>, Sérgio Morgado<sup>1</sup> and Ana**  
6 **Carolina Vicente<sup>1</sup>**

7  
8 <sup>1</sup> Laboratório de Genética Molecular de Microrganismos, Instituto Oswaldo Cruz,  
9 Fundação Oswaldo Cruz, 21040-360, Rio de Janeiro, RJ, Brazil;

10 <sup>2</sup> Universidade Federal de Roraima, 69310-000, Boa Vista, Roraima, Brazil.

11

12 **Corresponding Author: Érica L. Fonseca. [ericafon@ioc.fiocruz.br](mailto:ericafon@ioc.fiocruz.br).** Laboratório de  
13 Genética Molecular de Microrganismos, Instituto Oswaldo Cruz, Fundação Oswaldo  
14 Cruz. Avenida Brasil 4365, Manguinhos, 21040-360, Rio de Janeiro, Brazil.

15

16

17

18

19

20

21

22

23

24

25

26 BACKGROUND *Acinetobacter baumannii* outbreaks have been associated with  
27 pandemic International Clones (ICs), however the virulence factors involved with their  
28 pathogenicity are sparsely understood.

29 OBJECTIVES This study aimed to characterize the reddish-brown pigment produced  
30 by *A. baumannii* strains, and to determine its biosynthetic pathway by genomic  
31 approaches.

32 METHODS Pigment characterization was conducted by phenotypic tests in different  
33 growth conditions. The clonal relationship among *A. baumannii* was obtained by PFGE  
34 and MLST and antimicrobial susceptibility test was performed by Disc-Diffusion  
35 method. The genome of one representative strain was obtained for characterization of  
36 genes involved with pigment production.

37 FINDINGS The virulence-associated pyomelanin was the pigment produced by *A.*  
38 *baumannii*. These strains were extensively drug resistant and belonged to the IC-  
39 5/ST79. Genomic approaches revealed that the pyomelanin biosynthetic pathway in *A.*  
40 *baumannii* presented a particular architecture concerning the peripheral (*tyrB*, *phhB* and  
41 *hpd*) and central (*hmgB*, *hmgC* and *hmgR*) metabolic pathway genes. The identification  
42 of a distant HmgA homologue, probably without dioxygenase activity, could explain  
43 pyomelanin production. Virulence determinants involved with adherence  
44 (*csuA/BABCDE* and a T5bSS-carrying genomic island), and iron uptake  
45 (*basABCDEFGHJIJ*, *bauABCDEF* and *barAB*) were also characterized.

46 MAIN CONCLUSION The pyomelanin production together with other virulence  
47 determinants could play a role in *A. baumannii* pathogenicity.

48

49 Keywords: International clone – virulence - pyomelanin pigment – adherence -  
50 extensively drug resistance – persistence

51 *Acinetobacter baumannii* is one of the most relevant pathogens associated with  
52 nosocomial infections that presents the long-term ability to survive on inanimate  
53 surfaces, contributing to national and international clonal dissemination.<sup>(1)</sup> The *A.*  
54 *baumannii* outbreaks have been associated with high-risk pandemic lineages, named  
55 International Clones (ICs), characterized by a high capacity to persist in clinical  
56 environments and by presenting a broad antimicrobial resistance profile.<sup>(2,3)</sup> However, in  
57 spite of *A. baumannii* association with nosocomial and persistent infections, the role of  
58 virulence factors in its pathogenesis remains largely obscure. This virulence has been  
59 associated with features that enhance its persistence, such as increased adherence,  
60 resistance to dissection, biofilm formation, production of capsule and iron uptake.<sup>(4-6)</sup>

61 In bacteria, the production of pigments, as melanins, have been linked with  
62 virulence and pathogenicity. Melanins are a black-brown and yellow-red pigments  
63 derived from the oxidation of different phenolic compounds.<sup>(7)</sup> Depending on the  
64 biosynthesis pathway, melanin may be given a different designation, such as  
65 pyomelanin, which is a reddish-brown pigment resulted from tyrosine (Tyr) or  
66 phenylalanine (Phe) through the accumulation of homogentisic acid (HGA).<sup>(8)</sup> This  
67 pigment provides protection against oxidative stress and contribute to invasiveness and  
68 persistence by enhancing bacterial surface attachment and biofilm formation,  
69 extracellular electron transfer, resistance to heavy-metals and iron reduction/acquisition,  
70 induction of virulence factor expression, contributing to the adaptive response to  
71 environmental stress.<sup>(9,10)</sup> The pyomelanin production results from a defect in the  
72 catabolism pathway. *Pseudomonas putida* metabolizes Phe and Tyr through a peripheral  
73 pathway, regulated by the  $\sigma^{54}$ -dependent transcriptional activator PhhR, involving  
74 hydroxylation of Phe to Tyr by PhhAB, conversion of Tyr into 4-  
75 hydroxyphenylpyruvate by TyrB, and formation of HGA by Hpd as the central



101 The antimicrobial susceptibility test was determined by the disc-diffusion  
102 method, according to CLSI guidelines,<sup>(16)</sup> for the following antibiotics: gentamicin,  
103 amikacin, tobramycin, imipenem, meropenem, doripenem, ciprofloxacin,  
104 ampicillin/sulbactam, piperacillin/tazobactam, ticarcillin/clavulanic acid, cefotaxime,  
105 ceftazidime, cefepime, trimethoprim/sulphamethoxazole, tetracycline and minocycline.  
106 The MIC of polymyxin B was assessed by the broth microdilution with antibiotic  
107 concentrations ranged from 0.1 µg/ml to 64 µg/ml. The current definition criteria for  
108 classifying *A. baumannii* antimicrobial resistance was applied.<sup>(17)</sup>

109

110 *Phenotypic characterization of brownish pigment produced by A. baumannii strains -*

111 The strains were grown overnight on Mueller-Hinton (MH) and trypticase soy agar  
112 (TSA) media plates at different temperatures (28°C, 35°C and 40°C) to verify the  
113 influence on pigment production. To investigate whether the pigment is the pyomelanin  
114 resulted from the tyrosine metabolism, the 12 pigment-producing *A. baumannii* strains  
115 were grown in a minimal medium (T-Medium),<sup>(18)</sup> with the tyrosine and glutamate as  
116 the sole carbon sources. The pyomelanin-producing *A. baumannii* 456MDp,<sup>(15)</sup> kindly  
117 provided by Dr. Beatriz M. Moreira, and the *A. baumannii* ATCC 19606 were also  
118 included in this test as positive and negative controls, respectively.

119 An additional test was performed to determine which tyrosine metabolic  
120 pathway was involved with the brown pigment production. Therefore, the effect of  
121 sulcotrione [2-(2-chloro-4-methane sulfonylbenzoyl)-1,3-cyclohexanedione], an  
122 inhibitor of tyrosine metabolism via homogentisic acid,<sup>(19)</sup> was evaluated by growing  
123 the isolates in the T-medium in the presence of different concentrations (2.5, 10, 15 and  
124 20 mM) of sulcotrione.

125

126 *Determination of genetic relatedness of A. baumannii strains* - The genetic relationship  
127 among the 12 pigment-producing *A. baumannii* strains and between these strains and  
128 the pyomelanin-producing *A. baumannii* 456MDp, previously identified in a hospital  
129 from Rio de Janeiro,<sup>(15)</sup> were assessed by PFGE and MLST using the Pasteur and  
130 Oxford schemes (<https://pubmlst.org/abaumannii/>) available in the *A. baumannii* MLST  
131 website.

132

133 *Whole genome sequencing and genome annotation* - The genome sequence of one  
134 representative pigment-producing strain (AB4353) were obtained with the Illumina  
135 HiSeq 2500 sequencer using Nextera XT paired-end run with a ~500-bp insert library at  
136 the High-Throughput Sequencing Platform of the Oswaldo Cruz Foundation (Fiocruz,  
137 Rio de Janeiro, Brazil). The quality of the reads was assessed with FASTQC and *de*  
138 *novo* assembling was performed with the SPAdes 3.5 assembler with default settings.  
139 Gene prediction and annotation were performed with RAST tool and Prokka software  
140 (<https://github.com/tseemann/prokka>). The resistome was assessed with the  
141 Comprehensive Antibiotic Resistance Database (CARD) (<https://card.mcmaster.ca/>).  
142 The mobilome and virulome were assessed with IslandViewer4  
143 (<https://www.pathogenomics.sfu.ca/islandviewer/>) and VRprofile 2.0 ([https://bioinfo-](https://bioinfo-mml.sjtu.edu.cn/VRprofile/)  
144 [mml.sjtu.edu.cn/VRprofile/](https://bioinfo-mml.sjtu.edu.cn/VRprofile/)) web servers, respectively. AB4353 genome sequence has  
145 been submitted to GenBank under accession no. JAAXKU000000000.1.

146

## 147 **RESULTS AND DISCUSSION**

148

149 *Characterization of brownish-producer A. baumannii strains* - The 12 clinical *A.*  
150 *baumannii* strains producing a brown diffusible pigment were phenotypically and

151 genotypically characterized. All of them presented the extensively-drug resistant (XDR)  
152 phenotype, since they were susceptible only to polymixin B and tetracyclines.

153 All strains were able to produce the pigment on MH medium at all tested  
154 temperatures, with a more prominent production at higher temperatures (35°C and 40°C)  
155 (Fig. 1A, data shown for AB4353, AB1077, AB1113, AB41-RR4), as previously  
156 demonstrated.<sup>(15,20)</sup> It was verified that production of pigment at higher temperatures  
157 was due to the induction of *mela* (*hpd*), which is responsible for the HGA synthesis,<sup>(20)</sup>  
158 suggesting the role of this mechanism in the adaptive response to environmental stress.  
159 On the other hand, no pigment was observed on TSA medium.

160 Phenotypic tests to verify whether the brown pigment resulted from the tyrosine  
161 catabolic pathway revealed that, after 20h of incubation on T-medium in different  
162 temperatures, a brown diffusible pigment was observed in the 12 *A. baumannii* and in  
163 the positive control 456MDp strain (Fig. 1B, data shown for AB4353, AB77 and  
164 456MDp), while no pigment production was observed on the negative control ATCC  
165 19606 (data not shown). Moreover, a significant reduction in the brown pigment  
166 production occurred on T-medium plus 2.5 µM of sulcotrione (Fig. 1B). Considering  
167 that this substance is an inhibitor of tyrosine metabolism via HGA pathway, and that  
168 pyomelanin production results from its accumulation and efflux, it could be inferred that  
169 this brownish pigment corresponded to pyomelanin.

170

171 *Genetic relatedness and epidemiology of pyomelanin-producer A. baumannii* - The PFGE  
172 revealed that the 12 XDR pyomelanin-producing *A. baumannii* strains were clonally related  
173 (TABLE), however, no genetic relationship was observed between these strains and the  
174 pyomelanogenic *A. baumannii* 456 MDp strain recovered from a hospital in Rio de Janeiro  
175 in 2010.<sup>(15)</sup> All 12 strains belonged to ST79<sup>PAS</sup>/ST758<sup>OXF</sup>, which corresponds to the high-

176 risk pandemic International Clone V (IC-5), while the 456MDp strain belonged to  
177 ST1079<sup>PAS</sup>/ST1483<sup>OXF</sup> already identified in China in 2015 (MLST metadata). The IC-5 is  
178 prevalent in clinical settings spread in Brazil and South America,<sup>(21)</sup> however, the pigment  
179 production has never been highlighted as a phenotypic trait of this IC neither in Brazil nor in  
180 other continents. Interestingly, this lineage has persisted in HGR for more than one year (19  
181 months), which could be resulted from an increased adaptive fitness.

182

183 *The resistome of AB4353* - Resistome prediction analyses of AB4353 revealed the  
184 presence of several genes, conferring resistance to aminoglycosides (*aac(6')-Ia*),  
185 *aac(3')-Ile*, *aph(3'')-Ib*, *aph(6')-Id*, chloramphenicol (*cmlA*), sulfonamide (*sulI*),  $\beta$ -  
186 lactams (*bla*<sub>TEM-1b</sub> and *bla*<sub>OXA-65</sub>) and carbapenems (*bla*<sub>OXA-23</sub>), corroborating the  
187 observed XDR phenotype.

188

189 *Virulome of pyomelanin-producer AB4353 strain: adherence, iron uptake and*  
190 *desiccation tolerance* - Bacterial adherence constitutes an essential step in the  
191 colonization process. *In silico* analysis of AB4353 genome revealed the presence of a 18  
192 kb adherence-related genomic island previously identified in AbH120-A2, an *A.*  
193 *baumannii* strain with a remarkable adherence ability responsible for a large nosocomial  
194 outbreak in Spain from 2006 to 2008.<sup>(22)</sup> This island carried the Type Vb secretion  
195 system from the two-partner System (TPS) family composed by TpsA (AbFhaB) and  
196 TpsB (AbFhaC), a large exoprotein involved with Heme utilization and adhesion and its  
197 translocator channel, respectively. This adhesion-related secretion system had already  
198 been found in other Gram-negative bacteria, and it is considered one of the main  
199 virulence factors in *Bordetella pertussis*.<sup>(23)</sup> Interestingly, the AbH120-A2 (2006-2008)  
200 from Spain and AB4353 (2017) from Brazil belongs to the IC-5 (ST79), demonstrating



201 the increased adaptive fitness and the remarkable spread potential of this lineage. Such  
202 adaptation could be due to the presence of this adhesion-related island, among other  
203 factors, which has been probably contributing to IC-5 persistence in clinical settings  
204 worldwide for, at least, 10 years. Additionally, other determinants associated with  
205 biofilm formation and adherence phenotypes were also identified in AB4353, such as  
206 the biofilm-associated protein (Bap) and the CsuA/BABCDE usher-chaperone  
207 system.<sup>(24-26)</sup>

208 The iron uptake capacity has been considered an important component for  
209 bacterial growth and survival under iron-limiting conditions found in host environment,  
210 also contributing to pathogenicity. The AB4353 harbour the siderophore Acinetobactin  
211 operon identical to that found in the ATCC 19606<sup>T</sup>, composed by *basABCDEFGHIJ*,  
212 *bauABCDEF* and *barAB* genes, involved with biosynthesis, utilization and siderophore  
213 release, respectively.<sup>(27)</sup>

214 Desiccation tolerance contributes to the remarkable persistence character of *A.*  
215 *baumannii*, allowing it to become a successful pathogen in the nosocomial environment.  
216 The two-component System BfmRS is directly involved with the production of the  
217 desiccation resistance phenotype in this species.<sup>(28)</sup> Two residues in BfmR, Leu230 and  
218 Thr85, are crucial to the BfmR activity and the control of stress responses, which  
219 protect *A. baumannii* cells during desiccation. The deduced BfmR from AB4353  
220 presented the canonical residues and is identical to that of profoundly desiccation-  
221 tolerant strains,<sup>(28)</sup> indicating that AB4353 may have this desiccation tolerance  
222 phenotype. In fact, as aforementioned, this strain has persisted in HGR clinical settings  
223 for, at least, 19 months. Moreover, it has been shown that the copy number of *umuD*  
224 and *umuC* error-prone DNA polymerase V genes may directly contribute to desiccation-  
225 induced mutagenesis.<sup>(29)</sup> AB4353 presented one copy of *umuD* and three copies of

226 *umuC*, which may be contributing to increase the mutagenesis rates involved with  
227 desiccation-tolerant phenotype.

228

229 *Genomic characterization of the pyomelanin biosynthetic pathway - Pyomelanin*  
230 biosynthetic pathway is well known in *Pseudomonas* species.<sup>(13,14,18,20)</sup> However,  
231 although the pyomelanin production had already been demonstrated in *A. baumannii*,<sup>(15)</sup>  
232 its biosynthesis remains to be characterized in this species. Thus, we performed  
233 comparative genomic analysis to identify and characterize the genes involved with  
234 pyomelanin production in AB4353. Homolog genes of *hmgR*, *hmgB* and *hmgC*,  
235 involved with pyomelanin central catabolic pathway, were characterized in AB4353,  
236 sharing 29%, 45% and 46% deduced amino acid identity with those from *P. putida*,  
237 respectively. A homologue of *aroP2* gene, which encodes an aromatic amino acid  
238 permease, was found contiguous to the putative *hmgB* in AB4353 (Fig. 2), with a gene  
239 arrangement similar to that of *P. putida* KT2440.<sup>(11)</sup>

240 The HmgA is a ring-cleaving dioxygenase from the Dioxygenase Superfamily.  
241 Although no *hmgA* homologue has been identified in AB4353, a putative gene whose  
242 deduced product presented the type I ring-cleaving dioxygenase conserved domain,  
243 which is related to the main function of HmgA, was found between *hmgC* and *hmgR* in  
244 AB4353 (Fig. 2). Therefore, it suggested the presence of a distant homologue of *hmgA*  
245 with no dioxygenase activity in this strain.

246 The *in silico* analyses revealed that AB4353 harboured the *phhR*, *hpd* and *tyrB*  
247 genes from the peripheral pathway (Fig. 2), which presented 42%, 67% and 45% amino  
248 acid identity with those from *P. putida*, respectively. As found for some other genera,  
249 the *hpd* and *tyrB* were not linked to the *phh* operon in AB4353, as found for *P.*  
250 *putida*.<sup>(11)</sup> In fact, the *phhAB* were absent in AB4353, and the *hpd* was associated with

251 the *hmg* genes (Fig. 2), as observed in *Pseudomonas syringae*, *Xanthomonas*  
252 *axonopodis*, *Caulobacter crescentus*, *Bradyrhizobium japonicum*, *Mesorhizobium loti*,  
253 and *Sinorhizobium meliloti*.<sup>(11)</sup> Considering that the conversion of phenylalanine in  
254 tyrosine is mediated by *phhAB*, and that these genes are absent in AB4353, it can be  
255 assumed that a pathway other than hydroxylation of phenylalanine is probably involved  
256 in the tyrosine biosynthesis as demonstrated elsewhere.<sup>(11)</sup>

257         Comparison of the peripheral and central pathways of *Pseudomonas* species and  
258 other genera demonstrated a high heterogeneity in gene synteny.<sup>(11)</sup> In fact, AB4353  
259 displayed a new gene organization concerning both those involved with peripheral and  
260 central pathways. Interestingly, a conserved synteny of pyomelanin pathway genes was  
261 observed among AB4353 and two other genomes (AB120-02 and AB421) also from IC-  
262 5 (ST79) recovered from outbreaks in Spain in 2006-2008 and 2010.<sup>(22,30)</sup> The unique  
263 difference is that in AB421 the *hmgC* was separated from the putative ring-cleaving  
264 dioxygenase by a 3.6 kb segment. As aforementioned, the pyomelanin formation  
265 depends on the export of the accumulated HGA. AB4353 harboured the entire *hat* ABC  
266 transporter gene cluster, sharing 57% (HatA), 69% (HatB), 35% (HatC), 31% (HatD)  
267 deduced amino acid identity with those from *P. aeruginosa* UCBPP-PA14.<sup>(14)</sup>

268         Therefore, i) the presence of the peripheral pathway genes (*phhR*, *tyrB* and *hpd*)  
269 responsible for HGA formation from tyrosine metabolism; ii) the presence of a distant  
270 *hmgA* homologue, which is probably not functional, resulting in the HGA cytoplasmic  
271 accumulation; and iii) the presence of *hatABCDE* ABC transporter, which pumps HGA,  
272 allowing it to self-polymerize into pyomelanin out of the cell; indicate that AB4353  
273 presents the minimum requirements for pyomelanin biosynthesis, and that its production  
274 involves a pathway similar to that described in *Pseudomonas* species.<sup>(11,12)</sup>

275

276

## CONCLUSIONS

277           The production of pyomelanin, a pigment associated with virulence in bacteria,  
278 by *A. baumannii* strains belonging to the pandemic IC-5, and the existence of a set of  
279 genes related to increased adherence and iron uptake, could play a major role in the  
280 virulence and persistence of this pandemic lineage.

281

282

## ACKNOWLEDGMENTS

283 We acknowledge Dr. Beatriz Moreira for kindly provided the pyomelanin-producing *A.*  
284 *baumannii* 456MDp used as control in our study.

285

286

287

## AUTHOR CONTRIBUTIONS

288 EF – Conceptualization and design of the study, performed the experiments, analyzed  
289 and interpreted the data, wrote, reviewed and edited the manuscript; RC – collected the  
290 bacterial strains; FF and SM – performed the experiments; ACV - Conceptualization  
291 and design of the study, scientific supervision, funding acquisition, revision, edition and  
292 final approve the manuscript. All authors have read and agreed to the published version  
293 of the manuscript.

294

295

## REFERENCES

296 1. Rocha IV, Xavier DE, Almeida KRH, Oliveira SR, Lea NC. Multidrug-resistant  
297 *Acinetobacter baumannii* clones persist on hospital inanimate surfaces. Braz J Infect  
298 Dis. 2018; 22: 438-41. doi: 10.1016/j.bjid.2018.08.004.

- 299 2. Zarrilli R, Pournaras S, Giannouli M, Tsakris, A. Global evolution of multidrug-  
300 resistant *Acinetobacter baumannii* clonal lineages. *Int J Antimicrob Agents*. 2013;  
301 41: 11-19. doi: 10.1016/j.ijantimicag.2012.09.008.
- 302 3. Karah N, Sundsfjord A, Towner K, Samuelsen, Ø. Insights into the global molecular  
303 epidemiology of carbapenem non-susceptible clones of *Acinetobacter baumannii*.  
304 *Drug Resist Updat*. 2012;15: 237-47. doi: 10.1016/j.drug.2012.06.001.
- 305 4. Jones CL, Clancy M, Honnold C, Singh S, Snesrud E, Onmus-Leone F, et al. Fatal  
306 outbreak of an emerging clone of extensively drug-resistant *Acinetobacter baumannii*  
307 with enhanced virulence. *Clin Infect Dis*. 2015; 61: 145-54. doi: 10.1093/cid/civ225.
- 308 5. McConnell MJ, Actis L, Pachón J. *Acinetobacter baumannii*: human infections,  
309 factors contributing to pathogenesis and animal models. *FEMS Microbiol Rev*. 2013;  
310 37: 130-55. doi: 10.1111/j.1574-6976.2012.00344.x.
- 311 6. Giannouli M, Antunes LC, Marchetti V, Triassi M, Visca P, Zarrilli, R. Virulence-  
312 related traits of epidemic *Acinetobacter baumannii* strains belonging to the  
313 international clonal lineages I-III and to the emerging genotypes ST25 and ST78.  
314 *BMC Infect Dis*. 2013; 13: 282. doi: 10.1186/1471-2334-13-282.
- 315 7. Nosanchuk JD, Casadevall A. The contribution of melanin to microbial pathogenesis.  
316 *Cell Microbiol*. 2003;5:203-223. doi: 10.1046/j.1462-5814.2003.00268.x.
- 317 8. Yabuuchi E, Ohya A. Characterization of “Pyomelanin”-Producing Strains of  
318 *Pseudomonas aeruginosa*. *Int J Syst Bacteriol*. 1972;22:53-64.
- 319 9. Chatfield CH, Cianciotto NP. The secreted pyomelanin pigment of *Legionella*  
320 *pneumophila* confers ferric reductase activity. *Infect Immun*. 2007;75:4062–4070.  
321 doi: 10.1128/IAI.00489-07.

- 322 10. Valeru SP, Rompikuntal PK, Ishikawa T, Vaitkevicius K, Sjöling A, Dolganov N, et  
323 al. Role of melanin pigment in expression of *Vibrio cholerae* virulence factors.  
324 *Infect Immun.* 2007; 77: 935–42. doi: 10.1128/IAI.00929-08.
- 325 11. Arias-Barrau E, Olivera ER, Luengo JM, Fernández C, Galán B, García JL, et al.  
326 The homogentisate pathway: a central catabolic pathway involved in the  
327 degradation of L-phenylalanine, L-tyrosine, and 3-hydroxyphenylacetate in  
328 *Pseudomonas putida*. *J Bacteriol.* 2004; 186: 5062-77. doi:  
329 10.1128/JB.186.15.5062-5077.2004.
- 330 12. Rodríguez-Rojas A, Mena A, Martín S, Borrell N, Oliver A, Blázquez J.  
331 Inactivation of the *hmgA* gene of *Pseudomonas aeruginosa* leads to pyomelanin  
332 hyperproduction, stress resistance and increased persistence in chronic lung  
333 infection. *Microbiology* 2009;155:1050-1057. doi: 10.1099/mic.0.024745-0.
- 334 13. Ranjan VK, Saha T, Mukherjee S, Chakraborty R. Draft Genome Sequence of a  
335 Novel Bacterium, *Pseudomonas sp.* Strain MR 02, Capable of Pyomelanin  
336 Production, Isolated from the Mahananda River at Siliguri, West Bengal, India.  
337 *Genome Announc.* 2018; 6: e01443-17. doi: 10.1128/genomeA.01443-17.
- 338 14. Hunter RC, Newman DK. A putative ABC transporter, *hatABCDE*, is among  
339 molecular determinants of pyomelanin production in *Pseudomonas aeruginosa*. *J*  
340 *Bacteriol.* 2010;192:5962-5971. doi: 10.1128/JB.01021-10.
- 341 15. Coelho-Souza T, Martins N, Maia F, Frases S, Bonelli RR, Riley LW, et al.  
342 Pyomelanin production: a rare phenotype in *Acinetobacter baumannii*. *J Med*  
343 *Microbiol.* 2014;63:152-154. doi: 10.1099/jmm.0.064089-0.

- 344 16. CLSI. Performance standards for antimicrobial susceptibility testing: Twenty-  
345 second informational supplement M100-S27. Wayne, PA, USA: CLSI; 2017.
- 346 17. Magiorakos AP, Srinivasan A, Carey RB, Carmeli Y, Falagas ME, Giske CG, et al.  
347 Multidrug-resistant, extensively drug-resistant and pandrug-resistant bacteria: an  
348 international expert proposal for interim standard definitions for acquired  
349 resistance. *Clin Microbiol Infect.* 2012; 18:268-281. doi: 10.1111/j.1469-  
350 0691.2011.03570.x.
- 351 18. Arai T, Hamajima H, Kuwahara S. Pyomelanin production by *Pseudomonas*  
352 *aeruginosa*. I. Transformation of pyomelanin productivity. *Microbiol Immunol.*  
353 1980;24:1-10.
- 354 19. Turick CE, Caccavo F Jr, Tisa LS. Pyomelanin is produced by *Shewanella algae*  
355 BrY and affected by exogenous iron. *Can J Microbiol.* 2008;54:334-339. doi:  
356 10.1139/w08-014.
- 357 20. Zeng Z, Cai X, Wang P, Guo Y, Liu X, Li B, et al. Biofilm Formation and Heat  
358 Stress Induce Pyomelanin Production in Deep-Sea *Pseudoalteromonas sp.*  
359 SM9913. *Front Microbiol.* 2017;8:1822. doi: 10.3389/fmicb.2017.01822.
- 360 21. Caldart RV, Fonseca EL, Freitas F, Rocha L, Vicente AC. *Acinetobacter baumannii*  
361 infections in Amazon Region driven by extensively drug resistant international  
362 clones, 2016-2018. *Mem Inst Oswaldo Cruz.* 2019;114:e190232. doi:  
363 10.1590/0074-02760190232.
- 364 22. Pérez A, Merino M, Rumbo-Feal S, Álvarez-Fraga L, Vallejo JA, Beceiro A, et al.  
365 The FhaB/FhaC two-partner secretion system is involved in adhesion of

- 366 *Acinetobacter baumannii* AbH12O-A2 strain. *Virulence*. 2017;8:959-974.  
367 doi:10.1080/21505594.2016.1262313.
- 368 23. Melvin JA, Scheller EV, Noël CR, Cotter PA. New Insight into Filamentous  
369 Hemagglutinin Secretion Reveals a Role for Full-Length FhaB in *Bordetella*  
370 *Virulence*. *mBio*. 2015;6 pii: e01189-15.
- 371 24. Loehfelm TW, Luke NR, Campagnari AA. Identification and characterization of an  
372 *Acinetobacter baumannii* biofilm-associated protein. *J Bacteriol*. 2008;190:1036-  
373 1044. doi: 10.1128/JB.01416-07.
- 374 25. Tomaras AP, Dorsey CW, Edelmann RE, Actis LA. Attachment to and biofilm  
375 formation on abiotic surfaces by *Acinetobacter baumannii*: involvement of a novel  
376 chaperone-usher pili assembly system. *Microbiology*. 2003;149:3473-3484.doi:  
377 10.1099/mic.0.26541-0.
- 378 26. Brossard KA, Campagnari AA. The *Acinetobacter baumannii* biofilm-associated  
379 protein plays a role in adherence to human epithelial cells. *Infect Immun*.  
380 2012;80:228-233. doi: 10.1128/IAI.05913-11.
- 381 27. Mihara K, Tanabe T, Yamakawa Y, Funahashi T, Nakao H, Narimatsu S, et al.  
382 Identification and transcriptional organization of a gene cluster involved in  
383 biosynthesis and transport of acinetobactin, a siderophore produced by  
384 *Acinetobacter baumannii* ATCC 19606<sup>T</sup>. *Microbiology*. 2004;150:2587-2597.  
385 doi: 10.1099/mic.0.27141-0.
- 386 28. Farrow JM, Wells G, Pesci EC. Desiccation tolerance in *Acinetobacter baumannii* is  
387 mediated by the two-component response regulator BfmR. *PLoS One*.  
388 2018;13:e0205638. doi: 10.1371/journal.pone.0205638.



389 29. Norton MD, Spilka AJ, Godoy VG. Antibiotic resistance acquired through a DNA  
390 damage-inducible response in *Acinetobacter baumannii*. J Bacteriol.  
391 2013;195:1335-1345. doi: 10.1128/JB.02176-12.

392 30. Merino M, Alvarez-Fraga L, Gómez MJ, Aransay AM, Lavín JL, Chaves F, et al.  
393 Complete Genome Sequence of the Multiresistant *Acinetobacter baumannii* Strain  
394 AbH12O-A2, Isolated during a Large Outbreak in Spain. Genome Announc.  
395 2014;2:e01182-14. doi: 10.1128/genomeA.01182-14.

396

397

398 **Funding:** This study was funded by the Conselho Nacional de Desenvolvimento  
399 Científico e Tecnológico (CNPq). The APC was funded by Oswaldo Cruz Institute.

400

401

402 **Conflicts of interest:** The authors declare no conflict of interest.

403

404

405

406

407

408

409

410

411

412

413

**TABLE**

414 Clinical and genotypic features of the XDR pyomelanogenic *A. baumannii* strains

|          | <b>Isolation date</b> | <b>PFGE</b> | <b>MLST (IC)</b> | <b>Ward</b>           | <b>Clinical specimen</b> |
|----------|-----------------------|-------------|------------------|-----------------------|--------------------------|
| AB4353   | Oct/21/16             | A           | ST79 (IC-5)      | ICU                   | Catheter tip             |
| AB77     | Jan/05/17             | A           | ST79 (IC-5)      | others hospital wards | Wound secretion          |
| AB2299   | Feb/12/17             | A           | ST79 (IC-5)      | Emergency             | Bronchial aspirate       |
| AB1077   | Mar/08/17             | A           | ST79 (IC-5)      | ICU                   | Tracheal secretion       |
| AB1113   | Mar/08/17             | A           | ST79 (IC-5)      | ICU                   | CRL                      |
| AB81     | Oct/02/17             | A1          | ST79 (IC-5)      | ICU                   | Tracheal secretion       |
| AB04-RR5 | Jan/01/18             | A1          | ST79 (IC-5)      | ICU                   | Blood                    |
| AB28-RR5 | Jan/17/18             | A           | ST79 (IC-5)      | ICU                   | Tracheal secretion       |
| AB41-RR4 | Jan/19/18             | A           | ST79 (IC-5)      | ICU                   | Tracheal secretion       |
| AB51-RR5 | Jan/26/18             | A           | ST79 (IC-5)      | ICU                   | Tracheal secretion       |
| AB04-RR6 | Apr/25/18             | A           | ST79 (IC-5)      | ICU                   | Catheter tip             |
| AB05-RR6 | Apr/29/18             | A           | ST79 (IC-5)      | others hospital wards | Catheter tip             |

415

416 CRL, Cephalorachidian liquid

417

418

419

420

421

422

423

424

425

426

427

428 **Fig. 1: Pyomelanin production by the XDR *A. baumannii* strains.** (A) The  
429 conditions and temperatures used in the test are shown. Arrows indicate the  
430 pyomelanogenic *A. baumannii* from this study chosen as representative strains for these  
431 tests (AB4353, AB1077, AB1113, AB41-RR4). Other *A. baumannii* strains were used  
432 as negative controls; (B) Production of pyomelanin at minimal T-medium in the  
433 presence and in the absence of sulcotrione inhibitor at different temperatures. The image  
434 shows the pigment production by two pyomelanogenic *A. baumannii* representative  
435 strains of this study (AB4353 and AB77) and by the 456MDp strain used as positive  
436 control.

437

438

439

440

441

442

443

444

445

446

447

448

449

450

451

452 **Fig. 2: Gene organization of the pyomelanin biosynthetic pathway in *A. baumannii***

453 **AB4353.** Genes are represented by arrows and the central and peripheral pathways

454 genes are highlighted with different patterns.

455

TSA 28°C MH

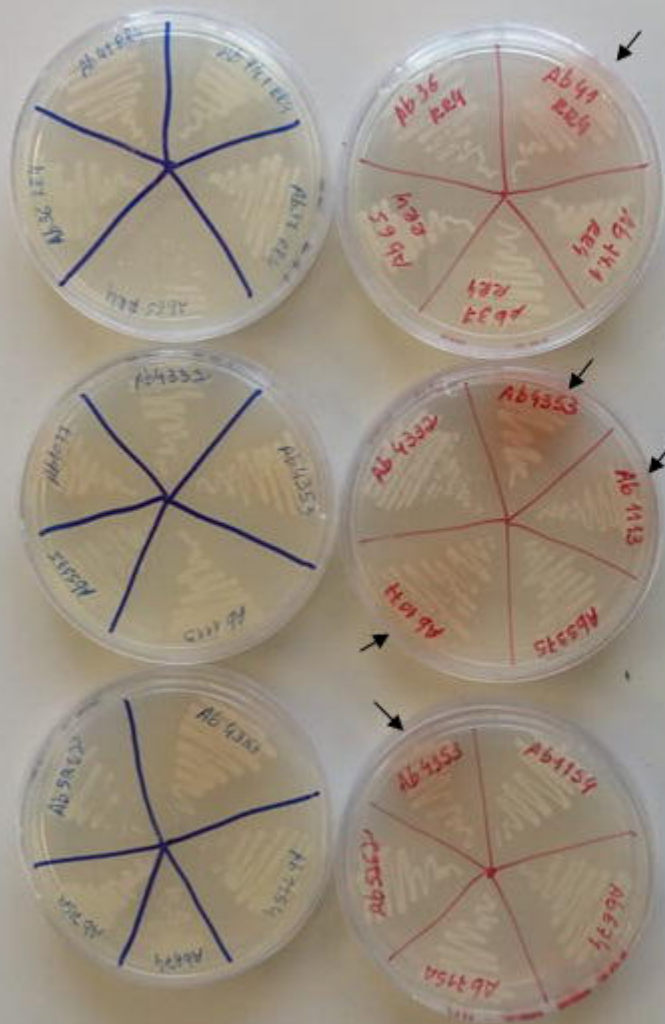

TSA 35°C MH

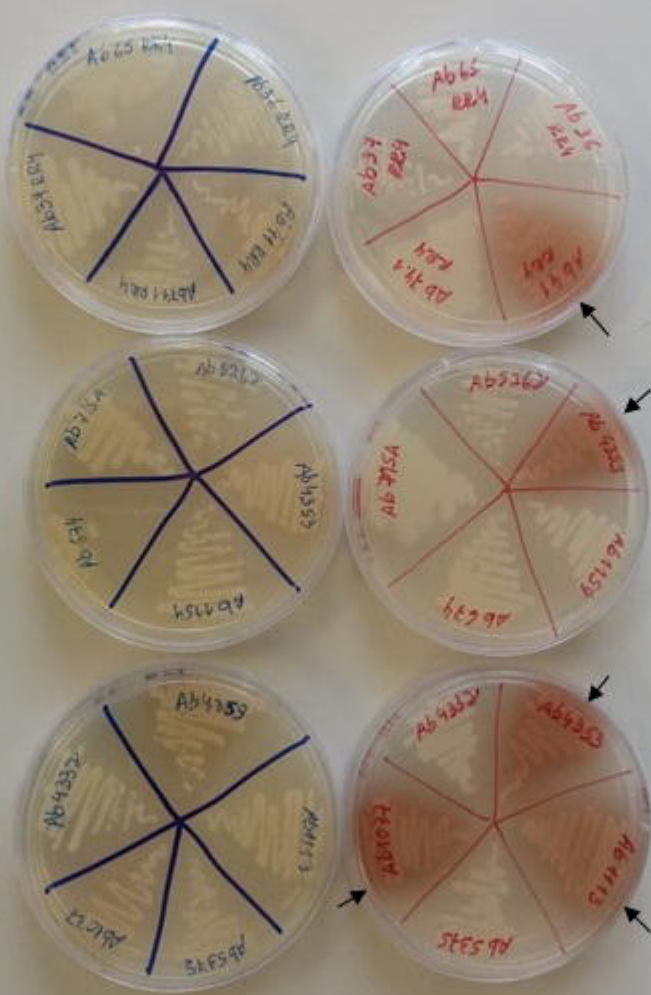

TSA 40°C MH

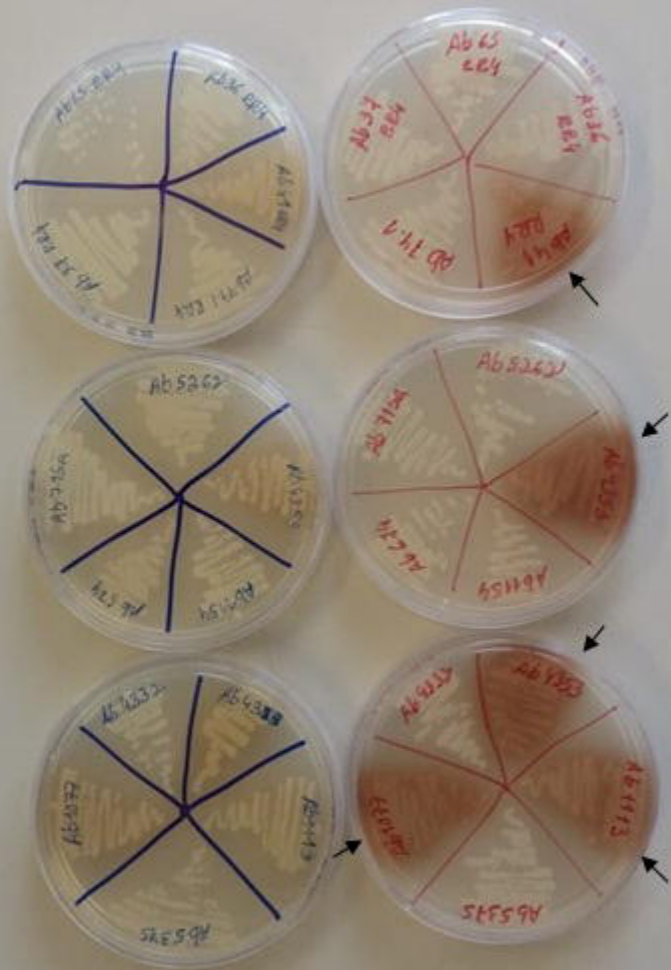

28°C

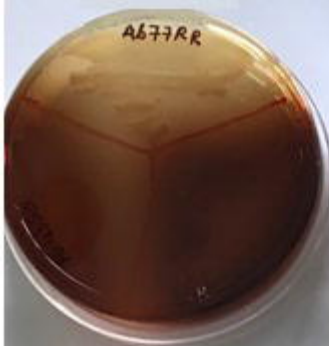

35°C

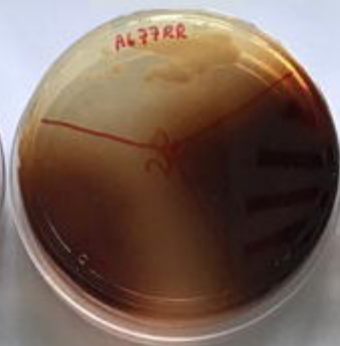

40°C

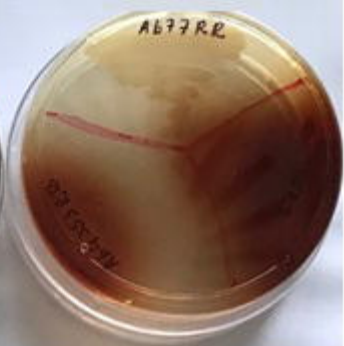

Tyrosin (+)

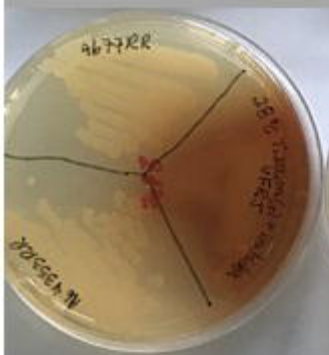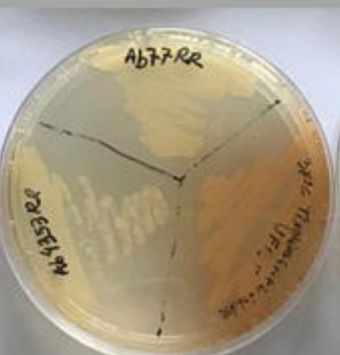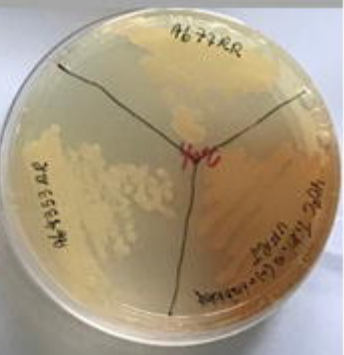

Tyrosin (+) Sulcotrione 2.5µM (+)

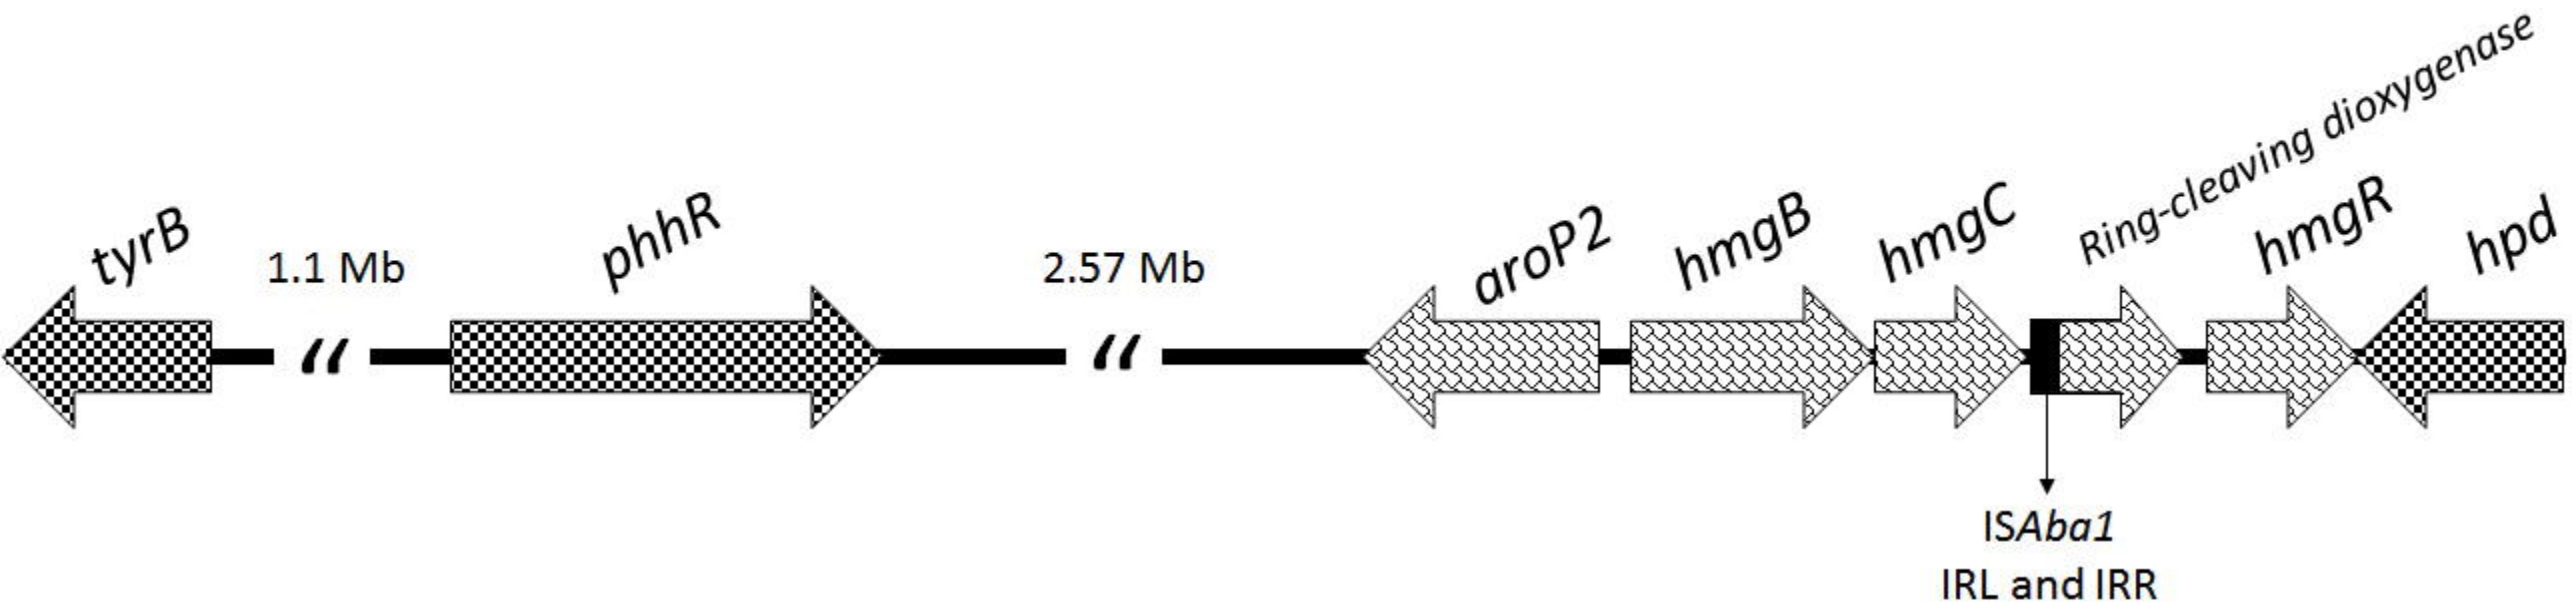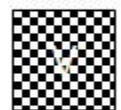

PERIPHERAL PATHWAY

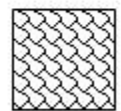

CENTRAL PATHWAY
